# Supplementary material for: Theoretical and experimental exploration of the photochemistry of resveratrol: beyond the simple double bond isomerization
Source: Royal Society of Chemistry journal article supplement (doi:10.1039/c2ob26241j), 2012-01-01
Supplement: c2ob26241j_2.pdf [file c2ob26241j_2.pdf]

# Theoretical and Experimental Exploration of the Photochemistry of Resveratrol: Beyond the Simple Double Bond Isomerization

Roi Álvarez Rodríguez, Inma R. Lahoz, Olalla Nieto Faza,  
Maria-Magdalena Cid<sup>†</sup> and Carlos Silva López<sup>†</sup>

November 17, 2010

Departamento de Química Orgánica, Universidade de Vigo, Lagoas Marcosende, 36200,  
Vigo, Galicia, Spain

<sup>†</sup>*Correspondence: carlos.silva@uvigo.es, mcid@uvigo.es*

## **Contents**

### **1 Cartesian Coordinates**

**S-3**

## 1 Cartesian Coordinates

trans-resveratrol

SCF Energy: -766.359299573

Num. Imaginary Frequencies: 0

|   |           |           |           |
|---|-----------|-----------|-----------|
| C | -3.653505 | 1.247422  | -0.055520 |
| C | -2.269053 | 1.077196  | -0.074440 |
| C | -1.718986 | -0.213151 | -0.021050 |
| C | -2.587999 | -1.319284 | 0.042431  |
| C | -3.970533 | -1.133821 | 0.060328  |
| C | -4.516872 | 0.150444  | 0.012433  |
| H | -1.645200 | 1.960991  | -0.140838 |
| H | -2.176221 | -2.326101 | 0.083127  |
| H | -5.596683 | 0.271984  | 0.025181  |
| O | -4.122993 | 2.531617  | -0.110561 |
| H | -5.092304 | 2.511777  | -0.096381 |
| O | -4.851248 | -2.179219 | 0.124158  |
| H | -4.348259 | -3.007811 | 0.152742  |
| C | -0.274731 | -0.468496 | -0.030501 |
| H | -0.005760 | -1.522930 | -0.073629 |
| C | 0.709148  | 0.452795  | 0.022101  |
| H | 0.432514  | 1.503849  | 0.092407  |
| C | 2.152561  | 0.212490  | 0.008159  |
| C | 3.026998  | 1.303713  | 0.155484  |
| C | 2.735694  | -1.062740 | -0.149146 |
| C | 4.409950  | 1.142297  | 0.154186  |
| H | 2.612331  | 2.301764  | 0.275975  |
| C | 4.111202  | -1.238724 | -0.152303 |
| H | 2.101234  | -1.934627 | -0.277475 |
| C | 4.959525  | -0.133454 | 0.000905  |
| H | 5.060930  | 2.007057  | 0.271495  |
| H | 4.551627  | -2.223212 | -0.275511 |
| O | 6.305794  | -0.367163 | -0.010864 |
| H | 6.772968  | 0.475263  | 0.102651  |

1 *CARTESIAN COORDINATES*

---

cis-resveratrol

SCF Energy: -766.382563076

Num. Imaginary Frequencies: 0

|   |           |           |           |
|---|-----------|-----------|-----------|
| C | -0.717133 | -2.162642 | -0.385191 |
| C | 0.630429  | -2.090058 | -0.381080 |
| H | -1.129167 | -3.147537 | -0.604767 |
| H | 1.153079  | -3.036507 | -0.515116 |
| C | 1.534069  | -0.930708 | -0.247012 |
| C | -1.746716 | -1.144622 | -0.115610 |
| C | 1.233190  | 0.324171  | -0.799030 |
| C | 2.148174  | 1.374392  | -0.688483 |
| C | 3.371142  | 1.200428  | -0.037471 |
| C | 3.674643  | -0.051359 | 0.497266  |
| C | 2.772359  | -1.114486 | 0.388579  |
| H | 0.294921  | 0.473379  | -1.324017 |
| O | 1.898548  | 2.611369  | -1.213967 |
| H | 4.075647  | 2.019553  | 0.040866  |
| O | 4.884229  | -0.183540 | 1.120088  |
| H | 3.024682  | -2.086897 | 0.805856  |
| C | -3.010122 | -1.273135 | -0.724297 |
| C | -4.038411 | -0.370332 | -0.481901 |
| C | -3.831896 | 0.688747  | 0.407914  |
| C | -2.593735 | 0.823435  | 1.047647  |
| C | -1.570125 | -0.082541 | 0.788749  |
| H | -3.184263 | -2.099292 | -1.408946 |
| H | -5.005571 | -0.473397 | -0.962322 |
| O | -4.871120 | 1.548912  | 0.620724  |
| H | -2.435426 | 1.631956  | 1.758742  |
| H | -0.623433 | 0.028772  | 1.304799  |
| H | 4.973278  | -1.090409 | 1.440892  |
| H | 1.028866  | 2.600880  | -1.634900 |
| H | -4.601077 | 2.217826  | 1.263676  |

1 *CARTESIAN COORDINATES*

---

cycloaddition-ts1

SCF Energy: -916.659313848

Num. Imaginary Frequencies: 1

Imaginary Frequency: -509.8907

|   |           |           |           |
|---|-----------|-----------|-----------|
| C | 0.782408  | 1.448070  | -1.227228 |
| C | -0.598408 | 1.528610  | -0.908563 |
| O | -0.613951 | 2.620102  | 0.611647  |
| O | -1.289103 | 3.684849  | 0.432823  |
| H | 1.132151  | 2.152738  | -1.978188 |
| H | -1.142358 | 2.262041  | -1.501134 |
| C | -1.448004 | 0.370355  | -0.493759 |
| C | 1.810266  | 0.686859  | -0.577303 |
| C | -1.121619 | -0.930153 | -0.901634 |
| C | -1.974020 | -1.994473 | -0.585793 |
| C | -3.150387 | -1.781098 | 0.131043  |
| C | -3.473662 | -0.481367 | 0.525361  |
| C | -2.637414 | 0.594498  | 0.213044  |
| H | -0.214842 | -1.109615 | -1.470587 |
| O | -1.699597 | -3.278901 | -0.961935 |
| H | -3.805589 | -2.608972 | 0.373814  |
| O | -4.636057 | -0.318186 | 1.221909  |
| H | -2.900567 | 1.599710  | 0.525802  |
| C | 3.114946  | 0.671448  | -1.139353 |
| C | 4.157197  | -0.025418 | -0.555198 |
| C | 3.938761  | -0.727986 | 0.639611  |
| C | 2.667851  | -0.712585 | 1.234089  |
| C | 1.624974  | -0.020241 | 0.639029  |
| H | 3.293815  | 1.220470  | -2.059876 |
| H | 5.148073  | -0.036804 | -0.996338 |
| O | 4.995709  | -1.395626 | 1.177207  |
| H | 2.503273  | -1.237840 | 2.172565  |
| H | 0.657852  | -0.002324 | 1.126102  |
| H | -4.742520 | 0.617131  | 1.440428  |
| H | -0.863906 | -3.292417 | -1.446632 |
| H | 4.721267  | -1.821145 | 2.000753  |

1 *CARTESIAN COORDINATES*

---

cycloaddition-int

SCF Energy: -916.668378834

Num. Imaginary Frequencies: 0

|   |           |           |           |
|---|-----------|-----------|-----------|
| C | 0.818575  | 1.329211  | -1.324731 |
| C | -0.567489 | 1.615700  | -0.853939 |
| O | -0.421112 | 2.539109  | 0.320291  |
| O | -1.229981 | 3.580454  | 0.239224  |
| H | 1.115267  | 1.805279  | -2.254587 |
| H | -1.091919 | 2.227171  | -1.592860 |
| C | -1.450723 | 0.441679  | -0.452455 |
| C | 1.815265  | 0.619710  | -0.613590 |
| C | -1.294060 | -0.793063 | -1.088158 |
| C | -2.160452 | -1.847742 | -0.775808 |
| C | -3.175849 | -1.685200 | 0.165940  |
| C | -3.321453 | -0.447752 | 0.793246  |
| C | -2.468529 | 0.620188  | 0.489426  |
| H | -0.498692 | -0.934877 | -1.814148 |
| O | -2.051093 | -3.074706 | -1.365411 |
| H | -3.839464 | -2.506615 | 0.407682  |
| O | -4.327245 | -0.331725 | 1.708723  |
| H | -2.598955 | 1.579478  | 0.979367  |
| C | 3.110804  | 0.459665  | -1.191603 |
| C | 4.120858  | -0.225061 | -0.546348 |
| C | 3.886286  | -0.781916 | 0.722430  |
| C | 2.627485  | -0.634779 | 1.326221  |
| C | 1.613644  | 0.048521  | 0.676731  |
| H | 3.301057  | 0.890976  | -2.170589 |
| H | 5.101240  | -0.342567 | -0.995668 |
| O | 4.915620  | -1.447149 | 1.314792  |
| H | 2.449038  | -1.057646 | 2.312734  |
| H | 0.653992  | 0.159787  | 1.166953  |
| H | -4.328246 | 0.567820  | 2.061812  |
| H | -1.310717 | -3.060161 | -1.985945 |
| H | 4.631719  | -1.771471 | 2.180116  |

1 *CARTESIAN COORDINATES*

---

cycloaddition-ts2

SCF Energy: -916.653799375

Num. Imaginary Frequencies: 1

Imaginary Frequency: -606.7183

|   |           |           |           |
|---|-----------|-----------|-----------|
| C | 0.855080  | 1.469265  | -1.167861 |
| C | -0.560371 | 1.782862  | -0.694961 |
| O | -0.341380 | 2.579151  | 0.485003  |
| O | 0.713441  | 3.373707  | 0.046032  |
| C | -1.498073 | 0.629773  | -0.387160 |
| H | -1.028241 | 2.425516  | -1.454372 |
| H | 1.123806  | 1.825971  | -2.157568 |
| C | 1.748969  | 0.564278  | -0.542890 |
| C | -1.519638 | -0.496152 | -1.214919 |
| C | -2.440007 | -1.520722 | -0.964826 |
| C | -3.334664 | -1.435307 | 0.102320  |
| C | -3.301627 | -0.307214 | 0.921279  |
| C | -2.391929 | 0.731122  | 0.682024  |
| H | -0.819924 | -0.583528 | -2.042496 |
| O | -2.504522 | -2.644300 | -1.738592 |
| H | -4.040923 | -2.234315 | 0.292839  |
| O | -4.191507 | -0.264186 | 1.955541  |
| H | -2.375350 | 1.606782  | 1.323489  |
| C | 2.988357  | 0.253494  | -1.172093 |
| C | 3.910377  | -0.590501 | -0.586134 |
| C | 3.630014  | -1.162026 | 0.666753  |
| C | 2.418455  | -0.872893 | 1.315386  |
| C | 1.494127  | -0.029236 | 0.724666  |
| H | 3.210485  | 0.697726  | -2.138431 |
| H | 4.852347  | -0.826043 | -1.069459 |
| O | 4.567614  | -1.989783 | 1.197797  |
| H | 2.206646  | -1.315925 | 2.286139  |
| H | 0.568509  | 0.194890  | 1.239622  |
| H | 4.266621  | -2.306274 | 2.060442  |
| H | -4.070834 | 0.564137  | 2.438304  |
| H | -1.836723 | -2.586116 | -2.434260 |

1 *CARTESIAN COORDINATES*

---

diotropic-ts

SCF Energy: -916.617873361

Num. Imaginary Frequencies: 1

Imaginary Frequency: -1060.0659

|   |           |           |           |
|---|-----------|-----------|-----------|
| C | -3.064876 | 0.761727  | -0.819442 |
| C | -1.933408 | 0.465437  | -0.028630 |
| C | -2.032649 | -0.583584 | 0.910868  |
| C | -3.201780 | -1.321739 | 1.033159  |
| C | -4.309292 | -1.017977 | 0.227970  |
| C | -4.235445 | 0.030424  | -0.700492 |
| C | -0.712465 | 1.214762  | -0.160648 |
| C | 0.569518  | 1.223529  | 0.048218  |
| C | 1.683444  | 0.283196  | -0.018986 |
| C | 2.964625  | 0.704256  | 0.364796  |
| C | 4.031904  | -0.198591 | 0.326770  |
| C | 3.836518  | -1.514836 | -0.093485 |
| C | 2.558839  | -1.925104 | -0.483065 |
| C | 1.480708  | -1.038200 | -0.453253 |
| O | -5.481604 | -1.700917 | 0.304232  |
| O | -0.716666 | 3.615995  | -0.145636 |
| O | 0.612397  | 3.682286  | -0.169999 |
| H | -0.952423 | 2.513965  | -0.462210 |
| H | 0.902166  | 2.376244  | 0.202455  |
| H | 3.119322  | 1.728648  | 0.692564  |
| O | 5.297854  | 0.152653  | 0.692701  |
| H | 4.667469  | -2.209276 | -0.124635 |
| O | 2.427057  | -3.220685 | -0.892686 |
| H | 0.492116  | -1.358985 | -0.768384 |
| H | -1.179943 | -0.810187 | 1.542265  |
| H | -3.263097 | -2.128749 | 1.759962  |
| H | -5.104901 | 0.252682  | -1.309276 |
| H | -3.010671 | 1.576169  | -1.535249 |
| H | -5.415554 | -2.384276 | 0.984858  |
| H | 5.307517  | 1.084891  | 0.946881  |
| H | 1.511853  | -3.375578 | -1.160802 |



1 *CARTESIAN COORDINATES*

---

dioxetane

SCF Energy: -916.717331933

Num. Imaginary Frequencies: 0

|   |           |           |           |
|---|-----------|-----------|-----------|
| C | 0.764487  | 2.099869  | -0.591027 |
| C | -0.749819 | 1.938992  | -0.909642 |
| C | -1.456199 | 0.660852  | -0.535347 |
| H | -1.007940 | 2.228294  | -1.935262 |
| H | 1.249960  | 2.696859  | -1.374639 |
| C | 1.643567  | 0.956871  | -0.197516 |
| C | -1.438051 | -0.415321 | -1.428296 |
| C | -2.077413 | -1.609671 | -1.079660 |
| C | -2.747316 | -1.732552 | 0.139351  |
| C | -2.766979 | -0.646383 | 1.012898  |
| C | -2.119666 | 0.552516  | 0.686427  |
| H | -0.927640 | -0.329603 | -2.385435 |
| O | -2.089054 | -2.699226 | -1.903055 |
| H | -3.249081 | -2.657145 | 0.398136  |
| O | -3.438821 | -0.807103 | 2.190845  |
| H | -2.139269 | 1.404682  | 1.358437  |
| C | 2.650534  | 0.515577  | -1.067937 |
| C | 3.464032  | -0.563769 | -0.743116 |
| C | 3.290390  | -1.212521 | 0.484773  |
| C | 2.303301  | -0.770956 | 1.373834  |
| C | 1.486244  | 0.301843  | 1.030399  |
| H | 2.801616  | 1.026818  | -2.015754 |
| H | 4.242841  | -0.908705 | -1.414642 |
| O | 4.117532  | -2.261044 | 0.762567  |
| H | 2.174768  | -1.268423 | 2.332745  |
| H | 0.725679  | 0.645611  | 1.721466  |
| H | 3.895326  | -2.619707 | 1.632006  |
| H | -3.392705 | 0.018459  | 2.690905  |
| H | -1.582503 | -2.497226 | -2.700431 |
| O | -1.010477 | 3.033913  | 0.006855  |
| O | 0.386607  | 2.959461  | 0.522991  |

1 *CARTESIAN COORDINATES*

---

diphenylacetylene

SCF Energy: -765.139238818

Num. Imaginary Frequencies: 0

|   |           |           |           |
|---|-----------|-----------|-----------|
| C | 0.832597  | -0.008164 | 0.000220  |
| C | -0.384204 | -0.006233 | 0.000445  |
| C | -1.808915 | -0.002684 | 0.000242  |
| C | 2.256037  | -0.009214 | 0.000049  |
| C | -2.511038 | 1.216484  | -0.000401 |
| C | -3.907865 | 1.207893  | -0.000791 |
| C | -4.619103 | 0.006690  | -0.000480 |
| C | -3.915729 | -1.199088 | 0.000428  |
| C | -2.518730 | -1.216912 | 0.000802  |
| H | -1.961395 | 2.152981  | -0.000373 |
| O | -4.642229 | 2.359794  | -0.001247 |
| H | -5.702347 | 0.010314  | -0.000779 |
| O | -4.657351 | -2.346113 | 0.001151  |
| H | -1.975407 | -2.157069 | 0.001957  |
| C | 2.982638  | -1.218819 | -0.001656 |
| C | 4.370002  | -1.221563 | -0.001700 |
| C | 5.070783  | -0.008954 | 0.000043  |
| C | 4.368278  | 1.201915  | 0.001710  |
| C | 2.978078  | 1.199905  | 0.001665  |
| H | 2.441380  | -2.159140 | -0.002897 |
| H | 4.930443  | -2.150251 | -0.003017 |
| O | 6.433502  | -0.071737 | -0.000397 |
| H | 4.910316  | 2.145172  | 0.003185  |
| H | 2.436728  | 2.140116  | 0.003157  |
| H | -4.060905 | -3.106114 | 0.000998  |
| H | -4.040843 | 3.115897  | -0.001353 |
| H | 6.793680  | 0.825009  | -0.000384 |
